# Supplementary material
Source: PubMed Central journal article supplement (PMC6283933)

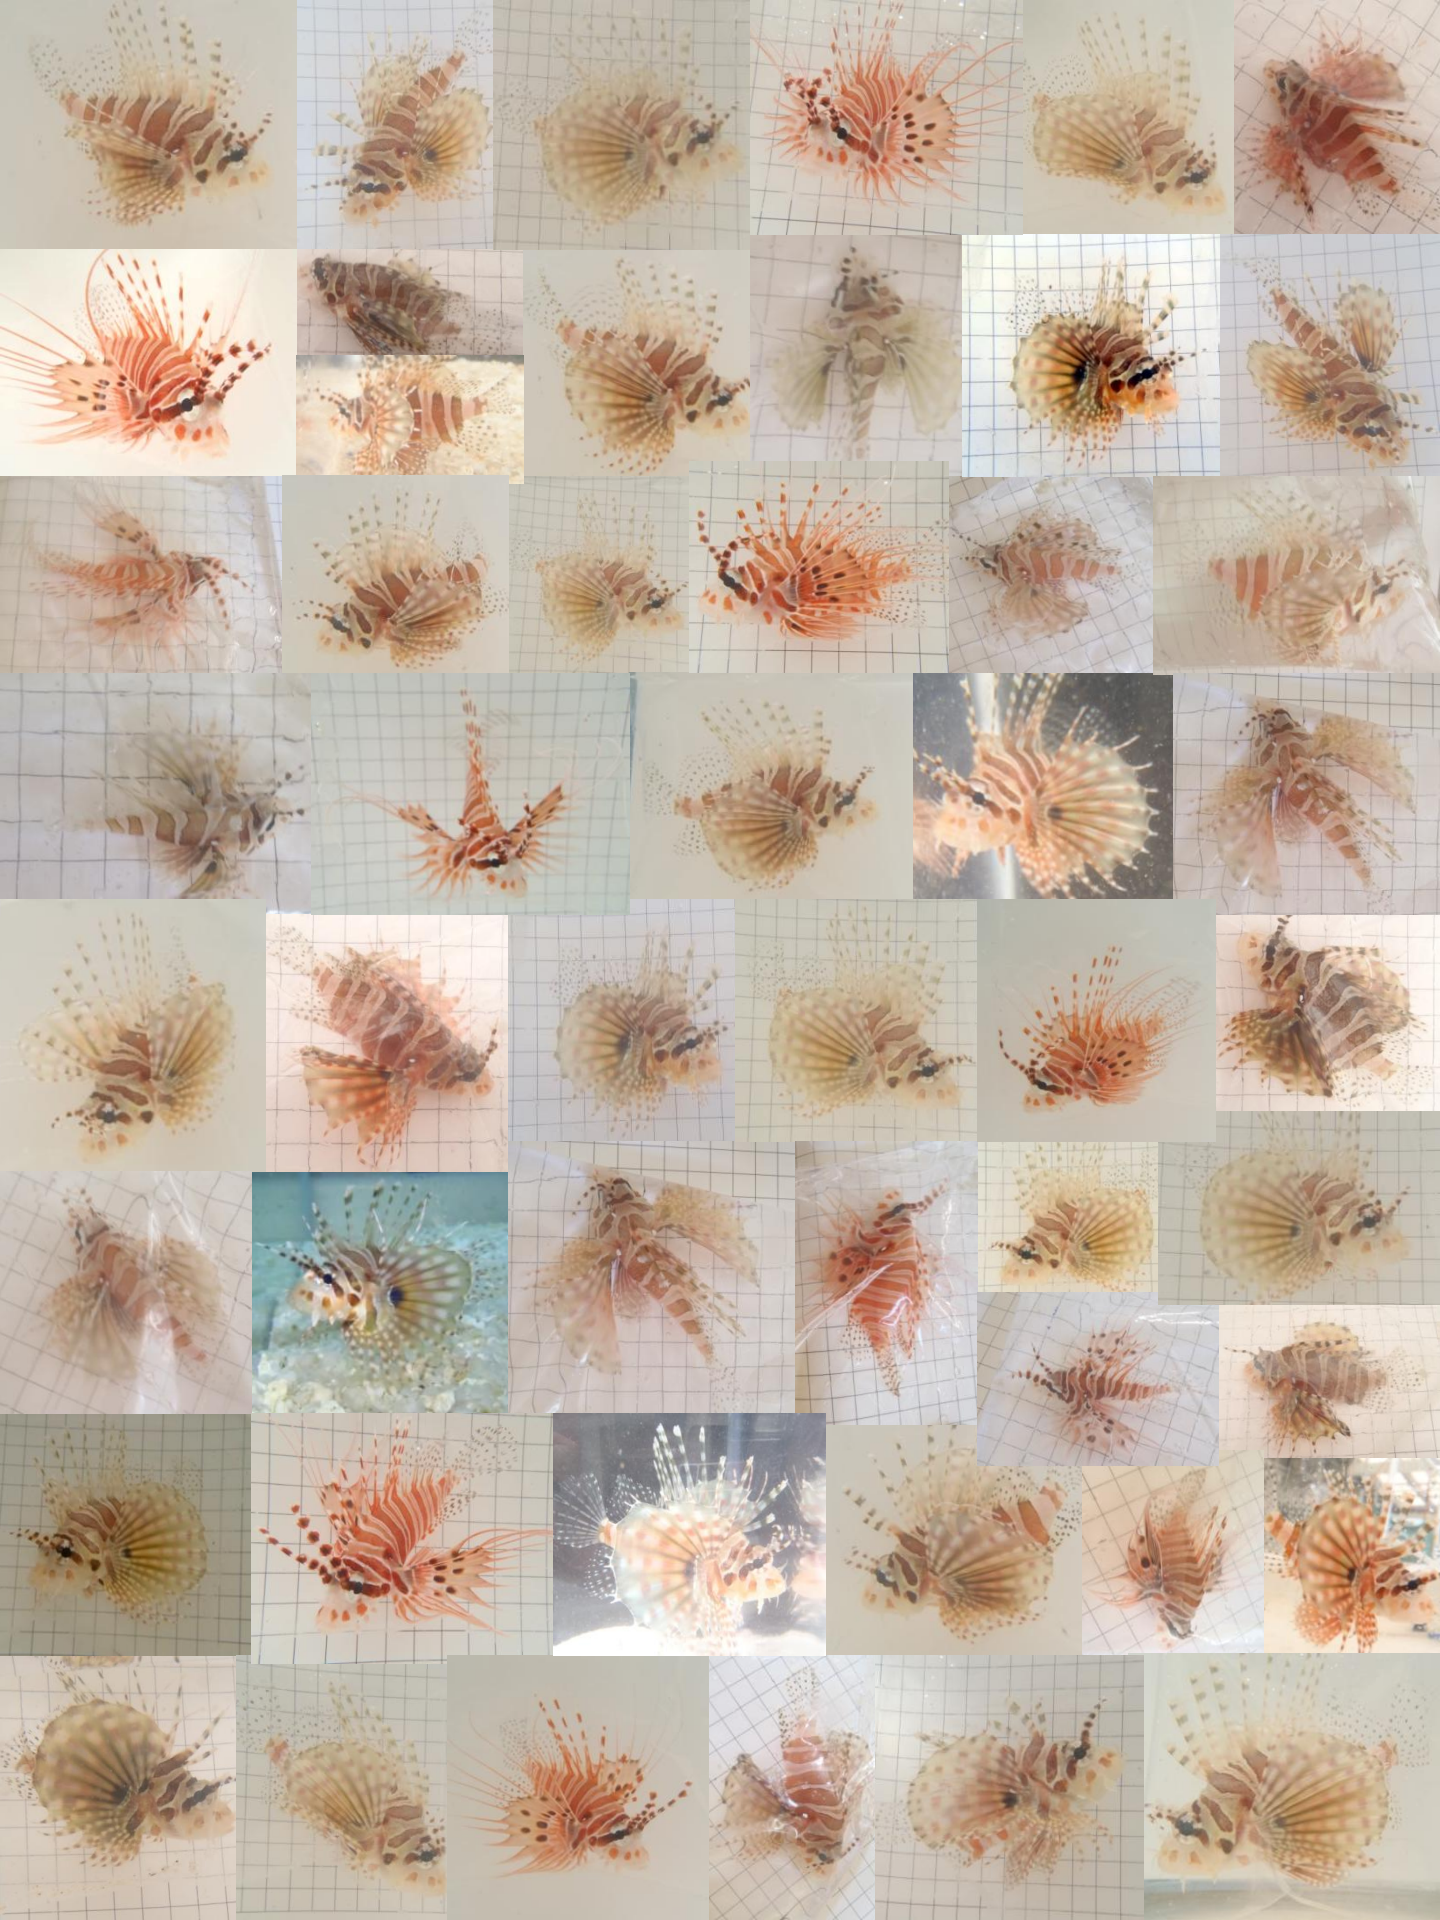

Supplement: rsbl20180716supp2.pdf [file rsbl20180716supp2.pdf]
